# Supplementary material for: Astronomical calibration of late middle Eocene radiolarian bioevents from ODP Site 1260 (equatorial Atlantic, Leg 207) and refinement of the global tropical radiolarian biozonation
Source: Copernicus journal article supplement (doi:10.5194/jm-41-1-2022), 2022-02-07
Supplement: Supplementary file 2 [file jm-41-1-2022-supplement.zip]

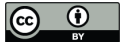

## *Supplement of*

# **Astronomical calibration of late middle Eocene radiolarian bioevents from ODP Site 1260 (equatorial Atlantic, Leg 207) and refinement of the global tropical radiolarian biozonation**

**Mathias Meunier and Taniel Danelian**

*Correspondence to:* Mathias Meunier ([mathias.meunier@univ-lille.fr](mailto:mathias.meunier@univ-lille.fr))

- [jm-41-1-2022-supplement-title-page.pdf](#)
- Supplements
  - [Supplement.pdf](#)
  - [Supplement\\_1.xlsx](#)
  - [Supplement\\_2.pdf](#)

The copyright of individual parts of the supplement might differ from the article licence.
