# Supplementary material for: Astronomical calibration of late middle Eocene radiolarian bioevents from ODP Site 1260 (equatorial Atlantic, Leg 207) and refinement of the global tropical radiolarian biozonation
Source: Copernicus journal article supplement (doi:10.5194/jm-41-1-2022), 2022-02-07
Supplement: Supplementary file 3 [file jm-41-1-2022-supplement.zip]

## **Supplements captions**

**Supplement 1:** Species occurrence per studied sample from ODP Hole 1260A (western equatorial Atlantic, Leg 207).

**Supplement 2:** Revised age-depth models for the IODP Sites U1331, U1332 and U1333 (eastern equatorial Pacific, expedition 320, “Pacific Equatorial Age Transect I”).
