# Supplementary figures and images for: Astronomical calibration of late middle Eocene radiolarian bioevents from ODP Site 1260 (equatorial Atlantic, Leg 207) and refinement of the global tropical radiolarian biozonation
Source: Copernicus journal article supplement (doi:10.5194/jm-41-1-2022), 2022-02-07

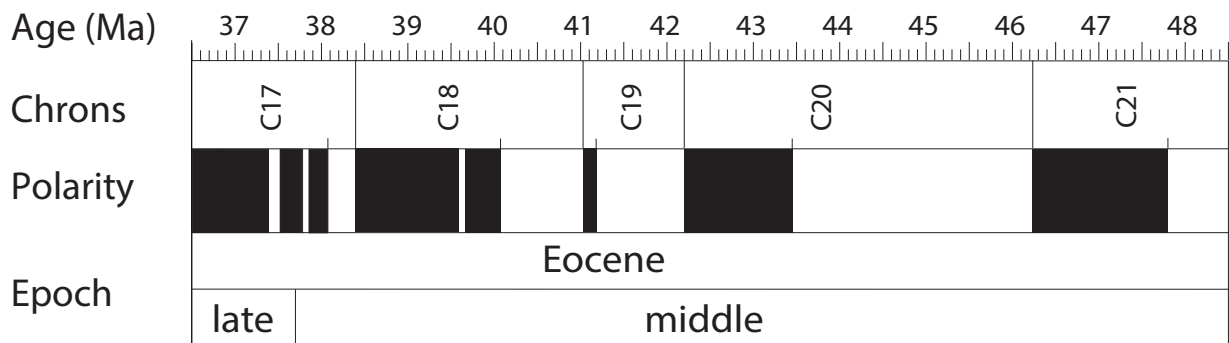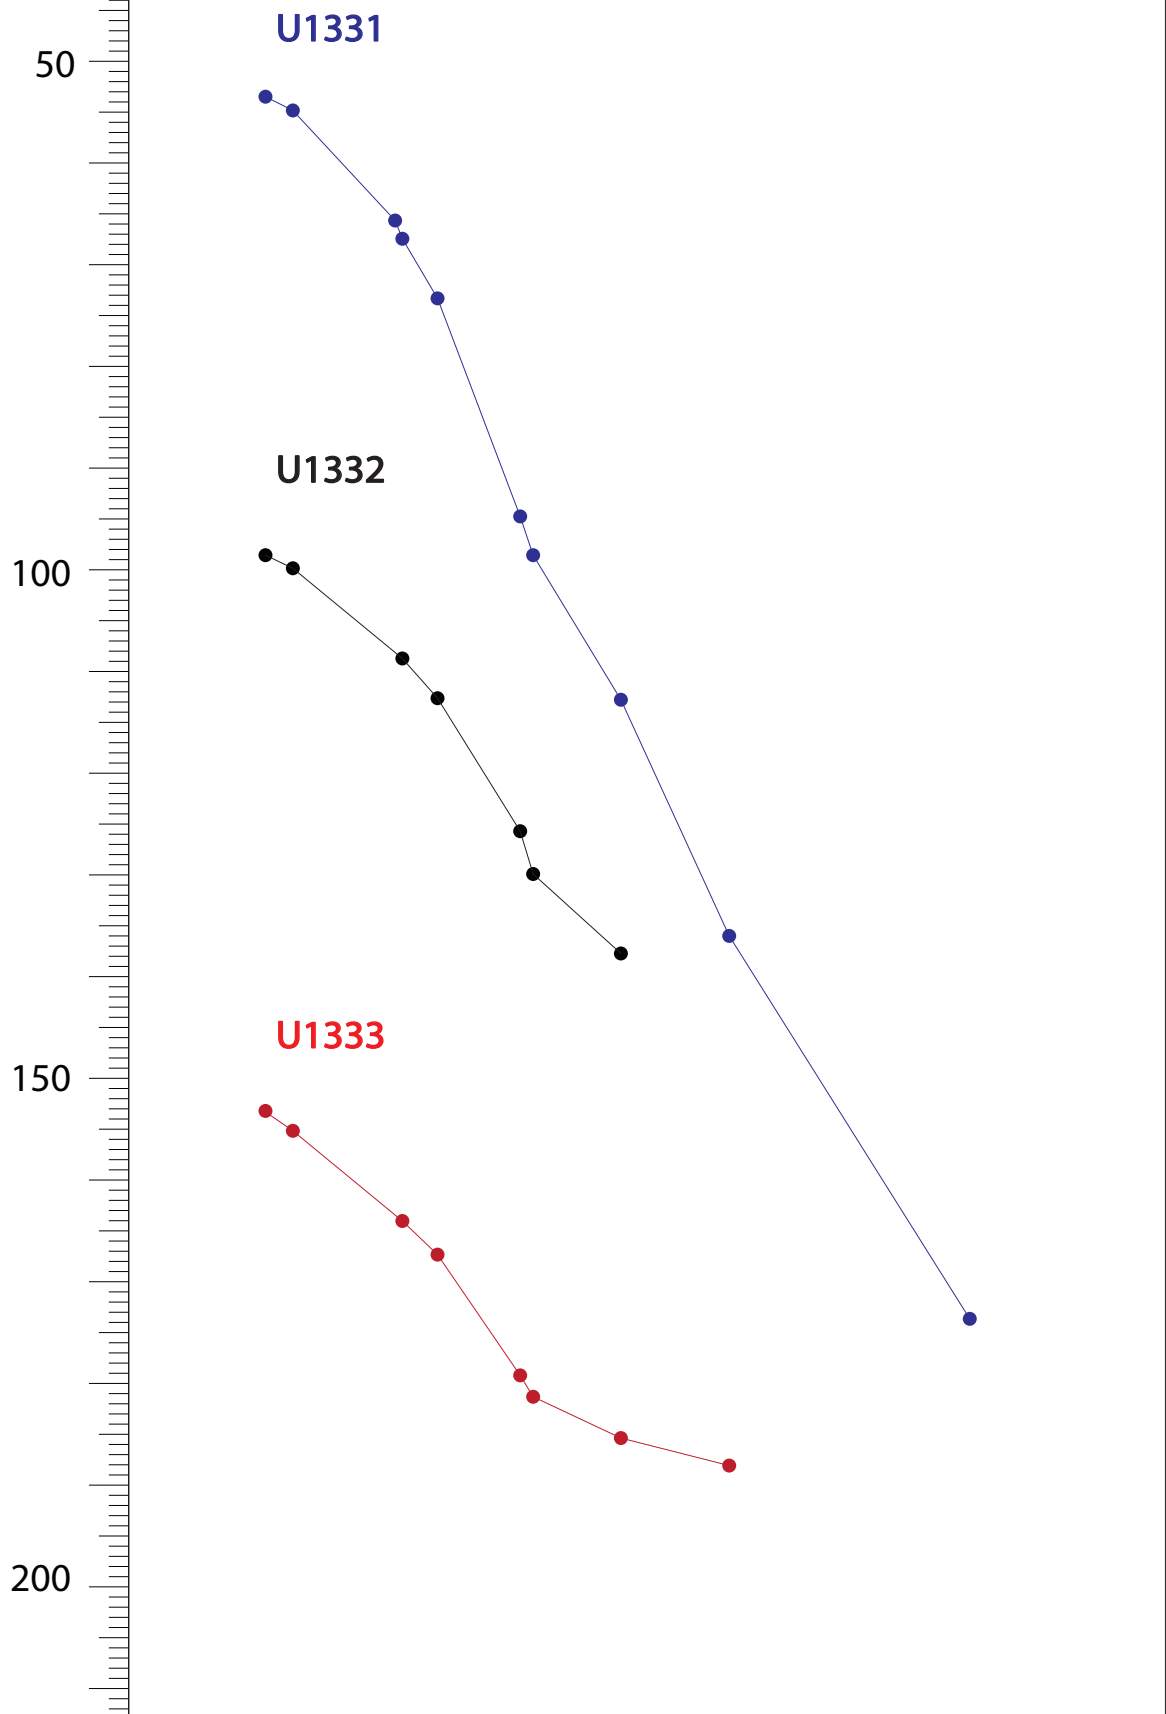

Supplement: Supplementary file 1 [file jm-41-1-2022-supplement.zip]
